# Supplementary material for: Electron-induced isomerisation of dichlorobenzene on Cu(111) and Ag(111)
Source: Royal Society of Chemistry journal article supplement (doi:10.1039/b718847a), 2008-01-01
Supplement: b718847a.pdf [file b718847a.pdf]

## Supporting information

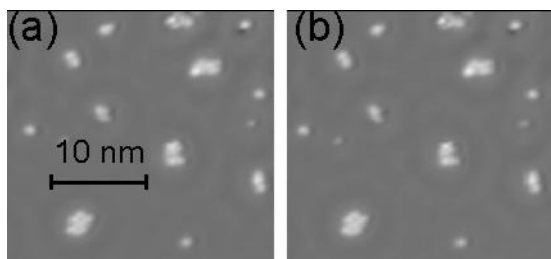

<sup>5</sup> Fig. S1: Overview image of DCIB on Ag(111):  
(a) Some molecules dissociated upon  
adsorption or cluster into larger islands (b)  
same spot of the surface imaged seven minutes  
10 after (a) showing that molecules are stationary  
at 5K; small shift of all molecules by to the  
right originates from a small thermal drift.
